# Supplementary material
Source: publisher figshare collection journal article supplement (https://frontiersin.figshare.com/ndownloader/files/31320934)
Supplement: Supplementary file 1 [file 31320934]

Table S1. Leaf area, root length and leaf area per root length in nitrate-fed or urea-fed plants in five species grown for 28 d in the chambers under ambient (aCO<sub>2</sub>) or elevated (eCO<sub>2</sub>) CO<sub>2</sub> treatments.

| Species      | CO <sub>2</sub>  | N-fed form                | Leaf area (cm <sup>2</sup> plant <sup>-1</sup> ) | Root length (m plant <sup>-1</sup> ) | Leaf area / root length ratio (cm <sup>2</sup> m <sup>-1</sup> ) |
|--------------|------------------|---------------------------|--------------------------------------------------|--------------------------------------|------------------------------------------------------------------|
| Wheat        | aCO <sub>2</sub> | Nitrate                   | 874 ± 15                                         | 222 ± 15                             | 4.01 ± 0.25                                                      |
|              |                  | Urea                      | 806 ± 36                                         | 208 ± 26                             | 4.06 ± 0.41                                                      |
|              | eCO <sub>2</sub> | Nitrate                   | 832 ± 23                                         | 315 ± 48                             | 3.00 ± 0.58                                                      |
|              |                  | Urea                      | 945 ± 47                                         | 238 ± 30                             | 4.22 ± 0.50                                                      |
|              | <b>ANOVA</b>     | <b>CO<sub>2</sub> (C)</b> | <b>P = 0.167</b>                                 | <b>P = 0.124</b>                     | <b>P = 0.432</b>                                                 |
|              |                  | <b>N form (N)</b>         | <b>P = 0.487</b>                                 | <b>P = 0.242</b>                     | <b>P = 0.244</b>                                                 |
| Rice         | aCO <sub>2</sub> | Nitrate                   | 148 ± 9                                          | 98 ± 6                               | 1.52 ± 0.03                                                      |
|              |                  | Urea                      | 145 ± 15                                         | 86 ± 10                              | 1.72 ± 0.06                                                      |
|              | eCO <sub>2</sub> | Nitrate                   | 172 ± 18                                         | 138 ± 7                              | 1.27 ± 0.12                                                      |
|              |                  | Urea                      | 213 ± 19                                         | 144 ± 19                             | 1.52 ± 0.07                                                      |
|              | <b>ANOVA</b>     | <b>CO<sub>2</sub> (C)</b> | <b>P = 0.013</b>                                 | <b>P = 0.003</b>                     | <b>P = 0.030</b>                                                 |
|              |                  | <b>N form (N)</b>         | <b>P = 0.250</b>                                 | <b>P = 0.837</b>                     | <b>P = 0.029</b>                                                 |
| Potato       | aCO <sub>2</sub> | Nitrate                   | 561 ± 22                                         | 148 ± 7                              | 3.82 ± 0.18                                                      |
|              |                  | Urea                      | 556 ± 17                                         | 149 ± 6                              | 3.75 ± 0.21                                                      |
|              | eCO <sub>2</sub> | Nitrate                   | 537 ± 18                                         | 155 ± 9                              | 3.49 ± 0.18                                                      |
|              |                  | Urea                      | 559 ± 26                                         | 153 ± 4                              | 3.68 ± 0.21                                                      |
|              | <b>ANOVA</b>     | <b>CO<sub>2</sub> (C)</b> | <b>P = 0.615</b>                                 | <b>P = 0.477</b>                     | <b>P = 0.389</b>                                                 |
|              |                  | <b>N form (N)</b>         | <b>P = 0.702</b>                                 | <b>P = 0.943</b>                     | <b>P = 0.802</b>                                                 |
| Guinea grass | aCO <sub>2</sub> | Nitrate                   | 961 ± 44                                         | 264 ± 22                             | 3.76 ± 0.39                                                      |
|              |                  | Urea                      | 974 ± 29                                         | 225 ± 15                             | 4.40 ± 0.32                                                      |
|              | eCO <sub>2</sub> | Nitrate                   | 1095 ± 27                                        | 254 ± 27                             | 4.47 ± 0.41                                                      |
|              |                  | Urea                      | 1114 ± 78                                        | 217 ± 27                             | 5.66 ± 1.10                                                      |
|              | <b>ANOVA</b>     | <b>CO<sub>2</sub> (C)</b> | <b>P = 0.017</b>                                 | <b>P = 0.743</b>                     | <b>P = 0.205</b>                                                 |
|              |                  | <b>N form (N)</b>         | <b>P = 0.750</b>                                 | <b>P = 0.185</b>                     | <b>P = 0.238</b>                                                 |
| Amaranthus   | aCO <sub>2</sub> | Nitrate                   | 918 ± 13                                         | 276 ± 19                             | 3.39 ± 0.21                                                      |
|              |                  | Urea                      | 937 ± 45                                         | 215 ± 26                             | 4.62 ± 0.56                                                      |
|              | eCO <sub>2</sub> | Nitrate                   | 827 ± 80                                         | 254 ± 52                             | 4.14 ± 1.10                                                      |
|              |                  | Urea                      | 908 ± 30                                         | 200 ± 21                             | 4.72 ± 0.45                                                      |
|              | <b>ANOVA</b>     | <b>CO<sub>2</sub> (C)</b> | <b>P = 0.244</b>                                 | <b>P = 0.636</b>                     | <b>P = 0.589</b>                                                 |
|              |                  | <b>N form (N)</b>         | <b>P = 0.325</b>                                 | <b>P = 0.155</b>                     | <b>P = 0.264</b>                                                 |
|              |                  | <b>C X N</b>              | <b>P = 0.540</b>                                 | <b>P = 0.923</b>                     | <b>P = 0.680</b>                                                 |

Each data is mean ± SE (n = 4).

Table S2. Biomass in each organ in nitrate-fed or urea-fed plants in five species grown for 28 d in the chambers under ambient (aCO<sub>2</sub>) or elevated (eCO<sub>2</sub>) CO<sub>2</sub> treatments.

| Species      | CO <sub>2</sub>  | N-fed form          | Biomass (g DW plant <sup>-1</sup> ) |                  |                  |                  |                  |
|--------------|------------------|---------------------|-------------------------------------|------------------|------------------|------------------|------------------|
|              |                  |                     | Leaf                                | Sheath or stem   | Shoot            | Tuber            | Root             |
| Wheat        | aCO <sub>2</sub> | Nitrate             | 3.11 ± 0.12                         | 1.22 ± 0.09      | 4.34 ± 0.20      |                  | 2.69 ± 0.38      |
|              |                  | Urea                | 3.17 ± 0.19                         | 1.36 ± 0.08      | 4.53 ± 0.27      |                  | 3.23 ± 1.14      |
|              | eCO <sub>2</sub> | Nitrate             | 4.14 ± 0.27                         | 2.00 ± 0.14      | 6.14 ± 0.40      |                  | 4.51 ± 1.35      |
|              |                  | Urea                | 4.06 ± 0.13                         | 2.29 ± 0.46      | 6.35 ± 0.44      |                  | 3.86 ± 0.92      |
|              | ANOVA            | CO <sub>2</sub> (C) | <i>P</i> < 0.001                    | <i>P</i> = 0.005 | <i>P</i> < 0.001 |                  | <i>P</i> = 0.252 |
|              |                  | N form (N)          | <i>P</i> = 0.968                    | <i>P</i> = 0.408 | <i>P</i> = 0.558 |                  | <i>P</i> = 0.956 |
|              |                  | C × N               | <i>P</i> = 0.725                    | <i>P</i> = 0.760 | <i>P</i> = 0.975 |                  | <i>P</i> = 0.566 |
| Rice         | aCO <sub>2</sub> | Nitrate             | 0.73 ± 0.05                         | 0.77 ± 0.07      | 1.50 ± 0.11      |                  | 0.42 ± 0.04      |
|              |                  | Urea                | 0.75 ± 0.08                         | 0.74 ± 0.08      | 1.49 ± 0.16      |                  | 0.35 ± 0.05      |
|              | eCO <sub>2</sub> | Nitrate             | 1.04 ± 0.08                         | 1.18 ± 0.10      | 2.22 ± 0.18      |                  | 0.62 ± 0.06      |
|              |                  | Urea                | 1.26 ± 0.11                         | 1.50 ± 0.17      | 2.76 ± 0.27      |                  | 0.71 ± 0.11      |
|              | ANOVA            | CO <sub>2</sub> (C) | <i>P</i> < 0.001                    | <i>P</i> < 0.001 | <i>P</i> < 0.001 |                  | <i>P</i> = 0.002 |
|              |                  | N form (N)          | <i>P</i> = 0.162                    | <i>P</i> = 0.234 | <i>P</i> = 0.190 |                  | <i>P</i> = 0.912 |
|              |                  | C × N               | <i>P</i> = 0.230                    | <i>P</i> = 0.155 | <i>P</i> = 0.172 |                  | <i>P</i> = 0.272 |
| Potato       | aCO <sub>2</sub> | Nitrate             | 1.88 ± 0.09                         | 0.89 ± 0.04      | 2.77 ± 0.12      | 1.87 ± 0.23      | 0.46 ± 0.02      |
|              |                  | Urea                | 2.03 ± 0.03                         | 0.89 ± 0.03      | 2.92 ± 0.05      | 2.80 ± 0.16      | 0.53 ± 0.03      |
|              | eCO <sub>2</sub> | Nitrate             | 2.08 ± 0.13                         | 0.91 ± 0.05      | 2.99 ± 0.16      | 3.28 ± 0.47      | 0.51 ± 0.03      |
|              |                  | Urea                | 2.13 ± 0.05                         | 0.83 ± 0.06      | 2.96 ± 0.02      | 3.77 ± 0.48      | 0.49 ± 0.03      |
|              | ANOVA            | CO <sub>2</sub> (C) | <i>P</i> = 0.092                    | <i>P</i> = 0.672 | <i>P</i> = 0.235 | <i>P</i> = 0.004 | <i>P</i> = 0.963 |
|              |                  | N form (N)          | <i>P</i> = 0.253                    | <i>P</i> = 0.421 | <i>P</i> = 0.576 | <i>P</i> = 0.117 | <i>P</i> = 0.349 |
|              |                  | C × N               | <i>P</i> = 0.519                    | <i>P</i> = 0.475 | <i>P</i> = 0.410 | <i>P</i> = 0.745 | <i>P</i> = 0.090 |
| Guinea grass | aCO <sub>2</sub> | Nitrate             | 4.30 ± 0.19                         | 4.59 ± 0.20      | 8.89 ± 0.39      |                  | 2.51 ± 0.31      |
|              |                  | Urea                | 4.39 ± 0.14                         | 4.74 ± 0.15      | 9.13 ± 0.19      |                  | 2.10 ± 0.12      |
|              | eCO <sub>2</sub> | Nitrate             | 5.52 ± 0.26                         | 5.47 ± 0.16      | 10.99 ± 0.41     |                  | 2.54 ± 0.15      |
|              |                  | Urea                | 5.34 ± 0.38                         | 5.35 ± 0.22      | 10.69 ± 0.43     |                  | 2.13 ± 0.30      |
|              | ANOVA            | CO <sub>2</sub> (C) | <i>P</i> = 0.001                    | <i>P</i> = 0.002 | <i>P</i> < 0.001 |                  | <i>P</i> = 0.884 |
|              |                  | N form (N)          | <i>P</i> = 0.871                    | <i>P</i> = 0.936 | <i>P</i> = 0.941 |                  | <i>P</i> = 0.108 |
|              |                  | C × N               | <i>P</i> = 0.607                    | <i>P</i> = 0.478 | <i>P</i> = 0.474 |                  | <i>P</i> = 1.000 |
| Amaranthus   | aCO <sub>2</sub> | Nitrate             | 4.13 ± 0.15                         | 2.22 ± 0.11      | 6.35 ± 0.23      |                  | 1.16 ± 0.08      |
|              |                  | Urea                | 3.52 ± 0.24                         | 1.54 ± 0.14      | 5.06 ± 0.36      |                  | 0.92 ± 0.16      |
|              | eCO <sub>2</sub> | Nitrate             | 3.91 ± 0.49                         | 2.28 ± 0.28      | 6.19 ± 0.69      |                  | 1.21 ± 0.21      |
|              |                  | Urea                | 3.49 ± 0.06                         | 1.69 ± 0.12      | 5.17 ± 0.14      |                  | 0.96 ± 0.04      |
|              | ANOVA            | CO <sub>2</sub> (C) | <i>P</i> = 0.671                    | <i>P</i> = 0.566 | <i>P</i> = 0.964 |                  | <i>P</i> = 0.753 |
|              |                  | N form (N)          | <i>P</i> = 0.093                    | <i>P</i> = 0.004 | <i>P</i> = 0.016 |                  | <i>P</i> = 0.099 |
|              |                  | C × N               | <i>P</i> = 0.746                    | <i>P</i> = 0.825 | <i>P</i> = 0.751 |                  | <i>P</i> = 0.985 |

Each data is mean ± SE (n = 4).

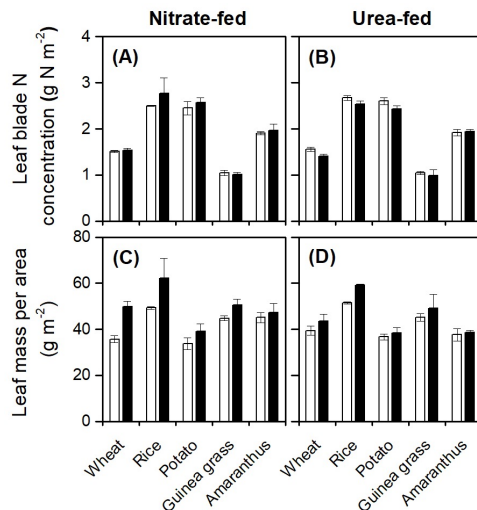

Figure S1. Foliar N concentration (A, B) and leaf mass per area (C, D) length in nitrate-fed or urea-fed plants in five species grown for 28 d in the chambers under ambient (aCO<sub>2</sub>) or elevated (eCO<sub>2</sub>) CO<sub>2</sub> treatments

Table S3. Total N concentration in each organ in nitrate-fed or urea-fed plants in five species grown for 28 d in the chambers under ambient (aCO<sub>2</sub>) or elevated (eCO<sub>2</sub>) CO<sub>2</sub> treatments.

| Species      | CO <sub>2</sub>  | N-fed form          | Nitrogen concentration (mg N g <sup>-1</sup> DW) |                  |                  |                  |                  |
|--------------|------------------|---------------------|--------------------------------------------------|------------------|------------------|------------------|------------------|
|              |                  |                     | Leaf                                             | Sheath or stem   | Shoot            | Tuber            | Root             |
| Wheat        | aCO <sub>2</sub> | Nitrate             | 42.62 ± 1.79                                     | 30.41 ± 3.07     | 39.20 ± 2.17     |                  | 13.79 ± 0.84     |
|              |                  | Urea                | 39.75 ± 1.68                                     | 25.46 ± 2.12     | 35.46 ± 1.76     |                  | 13.61 ± 1.96     |
|              | eCO <sub>2</sub> | Nitrate             | 31.16 ± 2.33                                     | 18.78 ± 2.17     | 27.14 ± 2.29     |                  | 11.55 ± 1.41     |
|              |                  | Urea                | 32.72 ± 1.41                                     | 19.78 ± 2.10     | 28.00 ± 1.83     |                  | 11.90 ± 1.53     |
|              | ANOVA            | CO <sub>2</sub> (C) | <i>P</i> < 0.001                                 | <i>P</i> < 0.001 | <i>P</i> < 0.001 |                  | <i>P</i> = 0.209 |
|              |                  | N form (N)          | <i>P</i> = 0.725                                 | <i>P</i> = 0.427 | <i>P</i> = 0.491 |                  | <i>P</i> = 0.955 |
|              |                  | C × N               | <i>P</i> = 0.251                                 | <i>P</i> = 0.240 | <i>P</i> = 0.279 |                  | <i>P</i> = 0.862 |
| Rice         | aCO <sub>2</sub> | Nitrate             | 50.70 ± 0.66                                     | 26.77 ± 0.67     | 38.41 ± 0.75     |                  | 15.33 ± 0.70     |
|              |                  | Urea                | 52.04 ± 0.95                                     | 27.78 ± 0.46     | 39.95 ± 0.71     |                  | 17.74 ± 1.01     |
|              | eCO <sub>2</sub> | Nitrate             | 44.76 ± 0.84                                     | 24.18 ± 0.83     | 33.86 ± 0.51     |                  | 14.97 ± 0.19     |
|              |                  | Urea                | 42.93 ± 1.42                                     | 23.65 ± 0.97     | 32.55 ± 1.44     |                  | 16.21 ± 0.05     |
|              | ANOVA            | CO <sub>2</sub> (C) | <i>P</i> < 0.001                                 | <i>P</i> = 0.001 | <i>P</i> < 0.001 |                  | <i>P</i> = 0.153 |
|              |                  | N form (N)          | <i>P</i> = 0.812                                 | <i>P</i> = 0.755 | <i>P</i> = 0.902 |                  | <i>P</i> = 0.012 |
|              |                  | C × N               | <i>P</i> = 0.142                                 | <i>P</i> = 0.331 | <i>P</i> = 0.149 |                  | <i>P</i> = 0.361 |
| Potato       | aCO <sub>2</sub> | Nitrate             | 73.18 ± 1.72                                     | 51.28 ± 1.88     | 66.06 ± 1.41     | 21.12 ± 1.81     | 21.83 ± 1.09     |
|              |                  | Urea                | 71.06 ± 0.51                                     | 38.04 ± 1.93     | 61.03 ± 0.86     | 18.47 ± 0.87     | 22.11 ± 1.29     |
|              | eCO <sub>2</sub> | Nitrate             | 66.34 ± 3.29                                     | 41.23 ± 3.80     | 58.72 ± 3.27     | 18.22 ± 1.53     | 22.22 ± 1.20     |
|              |                  | Urea                | 63.97 ± 3.30                                     | 33.79 ± 2.80     | 55.46 ± 2.63     | 15.88 ± 0.75     | 21.19 ± 0.17     |
|              | ANOVA            | CO <sub>2</sub> (C) | <i>P</i> = 0.016                                 | <i>P</i> = 0.022 | <i>P</i> = 0.014 | <i>P</i> = 0.059 | <i>P</i> = 0.801 |
|              |                  | N form (N)          | <i>P</i> = 0.386                                 | <i>P</i> = 0.003 | <i>P</i> = 0.091 | <i>P</i> = 0.082 | <i>P</i> = 0.726 |
|              |                  | C × N               | <i>P</i> = 0.962                                 | <i>P</i> = 0.306 | <i>P</i> = 0.701 | <i>P</i> = 0.908 | <i>P</i> = 0.538 |
| Guinea grass | aCO <sub>2</sub> | Nitrate             | 23.40 ± 1.10                                     | 15.85 ± 0.88     | 19.50 ± 0.97     |                  | 13.01 ± 0.64     |
|              |                  | Urea                | 23.23 ± 0.55                                     | 17.03 ± 0.50     | 20.01 ± 0.22     |                  | 13.77 ± 1.20     |
|              | eCO <sub>2</sub> | Nitrate             | 20.02 ± 0.77                                     | 13.55 ± 0.55     | 16.80 ± 0.67     |                  | 13.77 ± 0.97     |
|              |                  | Urea                | 20.02 ± 0.62                                     | 13.46 ± 0.72     | 16.76 ± 0.51     |                  | 14.26 ± 1.18     |
|              | ANOVA            | CO <sub>2</sub> (C) | <i>P</i> = 0.001                                 | <i>P</i> = 0.001 | <i>P</i> = 0.001 |                  | <i>P</i> = 0.551 |
|              |                  | N form (N)          | <i>P</i> = 0.914                                 | <i>P</i> = 0.440 | <i>P</i> = 0.724 |                  | <i>P</i> = 0.554 |
|              |                  | C × N               | <i>P</i> = 0.916                                 | <i>P</i> = 0.368 | <i>P</i> = 0.688 |                  | <i>P</i> = 0.901 |
| Amaranthus   | aCO <sub>2</sub> | Nitrate             | 42.57 ± 1.90                                     | 22.96 ± 1.36     | 35.74 ± 1.63     |                  | 19.46 ± 0.56     |
|              |                  | Urea                | 51.61 ± 3.77                                     | 32.84 ± 3.89     | 45.93 ± 3.95     |                  | 21.10 ± 1.47     |
|              | eCO <sub>2</sub> | Nitrate             | 42.09 ± 2.78                                     | 27.61 ± 5.64     | 36.86 ± 3.73     |                  | 20.41 ± 1.76     |
|              |                  | Urea                | 50.55 ± 1.06                                     | 29.68 ± 0.48     | 43.79 ± 0.84     |                  | 22.17 ± 0.76     |
|              | ANOVA            | CO <sub>2</sub> (C) | <i>P</i> = 0.771                                 | <i>P</i> = 0.836 | <i>P</i> = 0.861 |                  | <i>P</i> = 0.430 |
|              |                  | N form (N)          | <i>P</i> = 0.005                                 | <i>P</i> = 0.114 | <i>P</i> = 0.011 |                  | <i>P</i> = 0.194 |
|              |                  | C × N               | <i>P</i> = 0.914                                 | <i>P</i> = 0.287 | <i>P</i> = 0.580 |                  | <i>P</i> = 0.964 |

Each data is mean ± SE (n = 4).

Table S4. Organic-N concentration in each organ in nitrate-fed or urea-fed plants in five species grown for 28 d in the chambers under ambient (aCO<sub>2</sub>) or elevated (eCO<sub>2</sub>) CO<sub>2</sub> treatments.

| Species      | CO <sub>2</sub>  | N-fed form          | Organic nitrogen concentration (mg N g <sup>-1</sup> DW) |                  |                  |                  |                  |
|--------------|------------------|---------------------|----------------------------------------------------------|------------------|------------------|------------------|------------------|
|              |                  |                     | Leaf                                                     | Sheath or stem   | Shoot            | Tuber            | Root             |
| Wheat        | aCO <sub>2</sub> | Nitrate             | 39.87 ± 0.91                                             | 25.68 ± 1.70     | 35.88 ± 1.17     |                  | 13.52 ± 0.80     |
|              |                  | Urea                | 38.70 ± 1.45                                             | 22.86 ± 1.52     | 33.95 ± 1.41     |                  | 13.37 ± 1.88     |
|              | eCO <sub>2</sub> | Nitrate             | 30.84 ± 2.29                                             | 17.85 ± 1.85     | 26.62 ± 2.16     |                  | 11.39 ± 1.42     |
|              |                  | Urea                | 32.60 ± 1.40                                             | 18.77 ± 2.02     | 27.55 ± 1.81     |                  | 11.77 ± 1.51     |
|              | ANOVA            | CO <sub>2</sub> (C) | <i>P</i> < 0.001                                         | <i>P</i> = 0.006 | <i>P</i> = 0.001 |                  | <i>P</i> = 0.226 |
|              |                  | N form (N)          | <i>P</i> = 0.857                                         | <i>P</i> = 0.603 | <i>P</i> = 0.772 |                  | <i>P</i> = 0.937 |
| Rice         | aCO <sub>2</sub> | Nitrate             | 50.36 ± 0.62                                             | 24.04 ± 0.60     | 36.84 ± 0.71     |                  | 15.10 ± 0.57     |
|              |                  | Urea                | 51.67 ± 0.93                                             | 25.78 ± 0.44     | 38.76 ± 0.68     |                  | 17.41 ± 0.88     |
|              | eCO <sub>2</sub> | Nitrate             | 44.33 ± 0.90                                             | 21.60 ± 0.75     | 32.29 ± 0.52     |                  | 14.82 ± 0.18     |
|              |                  | Urea                | 42.49 ± 1.40                                             | 21.84 ± 0.92     | 31.37 ± 1.40     |                  | 16.00 ± 0.11     |
|              | ANOVA            | CO <sub>2</sub> (C) | <i>P</i> < 0.001                                         | <i>P</i> < 0.001 | <i>P</i> < 0.001 |                  | <i>P</i> = 0.139 |
|              |                  | N form (N)          | <i>P</i> = 0.799                                         | <i>P</i> = 0.799 | <i>P</i> = 0.581 |                  | <i>P</i> = 0.007 |
| Potato       | aCO <sub>2</sub> | Nitrate             | 64.48 ± 0.87                                             | 26.88 ± 2.07     | 52.27 ± 0.39     | 20.43 ± 1.70     | 21.39 ± 1.17     |
|              |                  | Urea                | 68.88 ± 0.35                                             | 27.87 ± 1.81     | 56.44 ± 0.22     | 18.28 ± 0.83     | 21.66 ± 1.44     |
|              | eCO <sub>2</sub> | Nitrate             | 61.94 ± 2.26                                             | 25.27 ± 1.77     | 50.81 ± 1.67     | 17.70 ± 1.37     | 21.99 ± 1.20     |
|              |                  | Urea                | 62.59 ± 2.94                                             | 28.41 ± 1.40     | 52.90 ± 1.87     | 15.66 ± 0.76     | 21.07 ± 0.17     |
|              | ANOVA            | CO <sub>2</sub> (C) | <i>P</i> = 0.040                                         | <i>P</i> = 0.770 | <i>P</i> = 0.073 | <i>P</i> = 0.050 | <i>P</i> = 0.992 |
|              |                  | N form (N)          | <i>P</i> = 0.211                                         | <i>P</i> = 0.267 | <i>P</i> = 0.030 | <i>P</i> = 0.113 | <i>P</i> = 0.775 |
| Guinea grass | aCO <sub>2</sub> | Nitrate             | 23.21 ± 1.03                                             | 14.52 ± 0.55     | 18.72 ± 0.78     |                  | 12.90 ± 0.65     |
|              |                  | Urea                | 23.14 ± 0.57                                             | 15.42 ± 0.36     | 19.13 ± 0.22     |                  | 13.70 ± 1.21     |
|              | eCO <sub>2</sub> | Nitrate             | 19.90 ± 0.76                                             | 13.17 ± 0.51     | 16.55 ± 0.63     |                  | 13.64 ± 0.99     |
|              |                  | Urea                | 19.81 ± 0.64                                             | 13.19 ± 0.70     | 16.52 ± 0.50     |                  | 14.19 ± 1.15     |
|              | ANOVA            | CO <sub>2</sub> (C) | <i>P</i> = 0.001                                         | <i>P</i> = 0.006 | <i>P</i> = 0.001 |                  | <i>P</i> = 0.558 |
|              |                  | N form (N)          | <i>P</i> = 0.917                                         | <i>P</i> = 0.414 | <i>P</i> = 0.746 |                  | <i>P</i> = 0.524 |
| Amaranthus   | aCO <sub>2</sub> | Nitrate             | 41.65 ± 1.84                                             | 19.05 ± 0.77     | 33.78 ± 1.32     |                  | 19.12 ± 0.46     |
|              |                  | Urea                | 50.14 ± 3.24                                             | 25.11 ± 1.89     | 42.64 ± 2.77     |                  | 20.81 ± 1.40     |
|              | eCO <sub>2</sub> | Nitrate             | 40.19 ± 2.39                                             | 21.30 ± 2.49     | 33.27 ± 2.12     |                  | 20.02 ± 1.87     |
|              |                  | Urea                | 49.53 ± 0.93                                             | 24.43 ± 0.93     | 41.43 ± 0.56     |                  | 22.09 ± 0.75     |
|              | ANOVA            | CO <sub>2</sub> (C) | <i>P</i> = 0.656                                         | <i>P</i> = 0.648 | <i>P</i> = 0.648 |                  | <i>P</i> = 0.400 |
|              |                  | N form (N)          | <i>P</i> = 0.002                                         | <i>P</i> = 0.018 | <i>P</i> = 0.018 |                  | <i>P</i> = 0.157 |
|              |                  | C × N               | <i>P</i> = 0.854                                         | <i>P</i> = 0.399 | <i>P</i> = 0.399 |                  | <i>P</i> = 0.884 |

Each data is mean ± SE (n = 4).

Table S5. Nitrate accumulation in each organ in nitrate-fed or urea-fed plants in five species grown for 28 d in the chambers under ambient (aCO<sub>2</sub>) or elevated (eCO<sub>2</sub>) CO<sub>2</sub> treatments.

| Species      | CO <sub>2</sub>  | N-fed form          | The percentage of nitrate-N in plant N (%) |                  |                  |                  |                  |                  | δ <sup>15</sup> N value in residue after nitrate extraction (‰) |
|--------------|------------------|---------------------|--------------------------------------------|------------------|------------------|------------------|------------------|------------------|-----------------------------------------------------------------|
|              |                  |                     | Leaf                                       | Sheath or stem   | Shoot            | Tuber            | Root             | Whole plant      |                                                                 |
| Wheat        | aCO <sub>2</sub> | Nitrate             | 6.19 ± 2.46                                | 14.52 ± 3.77     | 8.05 ± 2.81      |                  | 1.96 ± 0.23      | 7.11 ± 2.46      | -1.86 ± 0.33                                                    |
|              |                  | Urea                | 2.57 ± 0.92                                | 9.71 ± 2.68      | 4.13 ± 1.33      |                  | 1.67 ± 0.41      | 3.73 ± 1.18      | -3.60 ± 0.19                                                    |
|              | eCO <sub>2</sub> | Nitrate             | 1.02 ± 0.11                                | 4.55 ± 1.30      | 1.84 ± 0.40      |                  | 1.48 ± 0.44      | 1.82 ± 0.33      | -0.10 ± 0.31                                                    |
|              |                  | Urea                | 0.37 ± 0.31                                | 5.15 ± 0.96      | 1.59 ± 0.48      |                  | 1.06 ± 0.24      | 1.50 ± 0.42      | -3.49 ± 0.10                                                    |
|              | ANOVA            | CO <sub>2</sub> (C) | <i>P</i> = 0.016                           | <i>P</i> = 0.012 | <i>P</i> = 0.017 |                  | <i>P</i> = 0.134 | <i>P</i> = 0.019 | <i>P</i> = 0.007                                                |
|              |                  | N form (N)          | <i>P</i> = 0.133                           | <i>P</i> = 0.408 | <i>P</i> = 0.214 |                  | <i>P</i> = 0.317 | <i>P</i> = 0.209 | <i>P</i> = 0.001                                                |
|              |                  | C × N               | <i>P</i> = 0.284                           | <i>P</i> = 0.291 | <i>P</i> = 0.270 |                  | <i>P</i> = 0.858 | <i>P</i> = 0.292 | <i>P</i> = 0.014                                                |
|              |                  |                     |                                            |                  |                  |                  |                  |                  |                                                                 |
| Rice         | aCO <sub>2</sub> | Nitrate             | 0.68 ± 0.11                                | 10.22 ± 0.38     | 4.09 ± 0.20      |                  | 1.35 ± 0.69      | 3.83 ± 0.18      | 2.42 ± 1.63                                                     |
|              |                  | Urea                | 0.72 ± 0.06                                | 7.19 ± 0.18      | 2.96 ± 0.05      |                  | 1.72 ± 0.63      | 2.85 ± 0.10      | 0.98 ± 1.76                                                     |
|              | eCO <sub>2</sub> | Nitrate             | 0.97 ± 0.16                                | 10.65 ± 0.26     | 4.65 ± 0.26      |                  | 0.96 ± 0.16      | 4.25 ± 0.24      | -1.03 ± 0.41                                                    |
|              |                  | Urea                | 1.02 ± 0.12                                | 7.68 ± 0.74      | 3.62 ± 0.30      |                  | 1.29 ± 0.39      | 3.35 ± 0.24      | -1.67 ± 0.53                                                    |
|              | ANOVA            | CO <sub>2</sub> (C) | <i>P</i> = 0.027                           | <i>P</i> = 0.316 | <i>P</i> = 0.018 |                  | <i>P</i> = 0.441 | <i>P</i> = 0.040 | <i>P</i> = 0.056                                                |
|              |                  | N form (N)          | <i>P</i> = 0.728                           | <i>P</i> < 0.001 | <i>P</i> < 0.001 |                  | <i>P</i> = 0.513 | <i>P</i> < 0.001 | <i>P</i> = 0.485                                                |
|              |                  | C × N               | <i>P</i> = 0.975                           | <i>P</i> = 0.945 | <i>P</i> = 0.817 |                  | <i>P</i> = 0.973 | <i>P</i> = 0.835 | <i>P</i> = 0.784                                                |
|              |                  |                     |                                            |                  |                  |                  |                  |                  |                                                                 |
| Potato       | aCO <sub>2</sub> | Nitrate             | 11.80 ± 1.68                               | 47.60 ± 3.49     | 20.79 ± 1.64     | 3.23 ± 0.46      | 2.09 ± 0.61      | 17.09 ± 1.70     | -2.58 ± 0.16                                                    |
|              |                  | Urea                | 3.05 ± 0.69                                | 26.65 ± 3.52     | 7.47 ± 1.09      | 0.99 ± 0.80      | 2.17 ± 1.31      | 5.91 ± 0.84      | -3.68 ± 0.15                                                    |
|              | eCO <sub>2</sub> | Nitrate             | 6.44 ± 1.35                                | 37.74 ± 5.38     | 13.12 ± 2.35     | 2.72 ± 0.70      | 1.00 ± 0.61      | 10.09 ± 1.95     | -1.41 ± 0.39                                                    |
|              |                  | Urea                | 2.09 ± 0.54                                | 14.95 ± 4.38     | 4.45 ± 1.38      | 1.14 ± 0.47      | 0.56 ± 0.04      | 3.64 ± 1.05      | -2.69 ± 0.03                                                    |
|              | ANOVA            | CO <sub>2</sub> (C) | <i>P</i> = 0.019                           | <i>P</i> = 0.026 | <i>P</i> = 0.008 | <i>P</i> = 0.944 | <i>P</i> = 0.109 | <i>P</i> = 0.008 | <i>P</i> = 0.001                                                |
|              |                  | N form (N)          | <i>P</i> < 0.001                           | <i>P</i> < 0.001 | <i>P</i> < 0.001 | <i>P</i> = 0.015 | <i>P</i> = 0.821 | <i>P</i> < 0.001 | <i>P</i> = 0.001                                                |
|              |                  | C × N               | <i>P</i> = 0.083                           | <i>P</i> = 0.833 | <i>P</i> = 0.193 | <i>P</i> = 0.470 | <i>P</i> = 0.745 | <i>P</i> = 0.131 | <i>P</i> = 0.732                                                |
|              |                  |                     |                                            |                  |                  |                  |                  |                  |                                                                 |
| Guinea grass | aCO <sub>2</sub> | Nitrate             | 0.80 ± 0.29                                | 8.08 ± 2.18      | 3.88 ± 1.12      |                  | 0.90 ± 0.30      | 3.46 ± 0.94      | 1.45 ± 0.13                                                     |
|              |                  | Urea                | 0.42 ± 0.16                                | 9.41 ± 1.27      | 4.39 ± 0.66      |                  | 0.51 ± 0.28      | 3.85 ± 0.54      | -2.65 ± 0.16                                                    |
|              | eCO <sub>2</sub> | Nitrate             | 0.60 ± 0.14                                | 2.76 ± 0.49      | 1.46 ± 0.17      |                  | 0.97 ± 0.23      | 1.38 ± 0.18      | 1.55 ± 0.13                                                     |
|              |                  | Urea                | 1.08 ± 0.52                                | 2.00 ± 0.24      | 1.46 ± 0.39      |                  | 0.50 ± 0.21      | 1.31 ± 0.33      | -1.74 ± 0.13                                                    |
|              | ANOVA            | CO <sub>2</sub> (C) | <i>P</i> = 0.472                           | <i>P</i> < 0.001 | <i>P</i> = 0.002 |                  | <i>P</i> = 0.917 | <i>P</i> = 0.002 | <i>P</i> = 0.221                                                |
|              |                  | N form (N)          | <i>P</i> = 0.883                           | <i>P</i> = 0.832 | <i>P</i> = 0.719 |                  | <i>P</i> = 0.121 | <i>P</i> = 0.779 | <i>P</i> < 0.001                                                |
|              |                  | C × N               | <i>P</i> = 0.201                           | <i>P</i> = 0.435 | <i>P</i> = 0.713 |                  | <i>P</i> = 0.864 | <i>P</i> = 0.696 | <i>P</i> = 0.533                                                |
|              |                  |                     |                                            |                  |                  |                  |                  |                  |                                                                 |
| Amaranthus   | aCO <sub>2</sub> | Nitrate             | 2.15 ± 0.26                                | 16.67 ± 2.88     | 5.40 ± 0.78      |                  | 1.72 ± 0.48      | 5.08 ± 0.75      | 0.05 ± 0.16                                                     |
|              |                  | Urea                | 2.68 ± 0.97                                | 21.54 ± 6.78     | 6.68 ± 2.06      |                  | 1.32 ± 0.46      | 6.31 ± 2.00      | -2.63 ± 0.50                                                    |
|              | eCO <sub>2</sub> | Nitrate             | 4.38 ± 1.14                                | 19.43 ± 6.07     | 8.84 ± 3.04      |                  | 2.08 ± 1.37      | 8.30 ± 2.81      | 0.25 ± 0.39                                                     |
|              |                  | Urea                | 2.00 ± 0.27                                | 17.72 ± 2.63     | 5.36 ± 0.56      |                  | 0.38 ± 0.08      | 4.93 ± 0.51      | -3.24 ± 0.26                                                    |
|              | ANOVA            | CO <sub>2</sub> (C) | <i>P</i> = 0.335                           | <i>P</i> = 0.916 | <i>P</i> = 0.586 |                  | <i>P</i> = 0.710 | <i>P</i> = 0.615 | <i>P</i> = 0.611                                                |
|              |                  | N form (N)          | <i>P</i> = 0.251                           | <i>P</i> = 0.755 | <i>P</i> = 0.571 |                  | <i>P</i> = 0.195 | <i>P</i> = 0.560 | <i>P</i> < 0.001                                                |
|              |                  | C × N               | <i>P</i> = 0.083                           | <i>P</i> = 0.519 | <i>P</i> = 0.234 |                  | <i>P</i> = 0.412 | <i>P</i> = 0.222 | <i>P</i> = 0.336                                                |
|              |                  |                     |                                            |                  |                  |                  |                  |                  |                                                                 |

Each data is mean ± SE (n = 4).

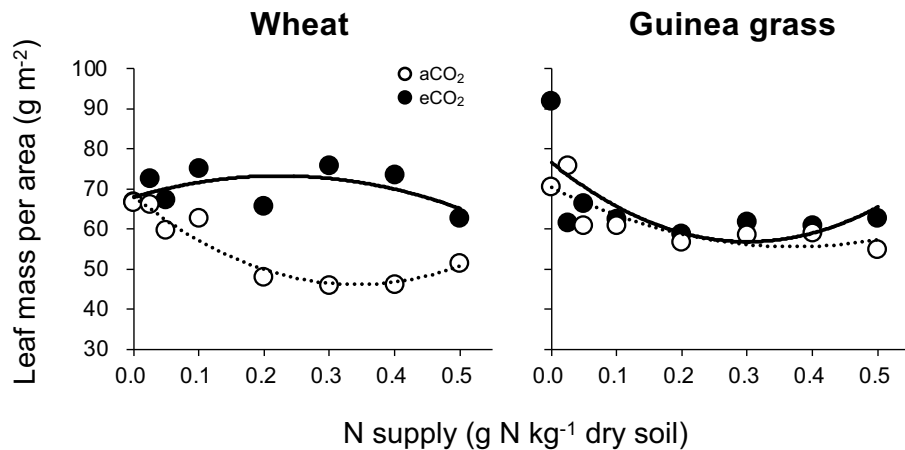

Figure S2. Changes in leaf mass per area of wheat or guinea grass according to N supply grown for 28 d in the chambers under ambient (aCO<sub>2</sub>) or elevated (eCO<sub>2</sub>) CO<sub>2</sub> treatments.

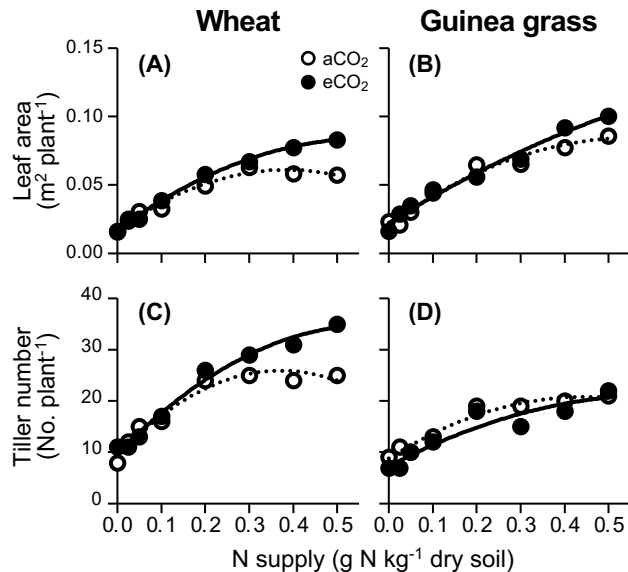

Figure S3. Changes in leaf area (A, B) and the number of tillers (C, D) of wheat or guinea grass according to N supply grown for 28 d in the chambers under ambient (aCO<sub>2</sub>) or elevated (eCO<sub>2</sub>) CO<sub>2</sub> treatments.
